# Supplementary material for: Gradual Expansion of a Stent to Prevent Periprocedural Complications after Carotid Artery Stenting for Vulnerable Severe Stenotic Lesions with Intraplaque Hemorrhages: A Retrospective Observational Study
Source: MDPI journal article supplement (doi:10.3390/life12010131), 2022-01-17
Supplement: s1 [file s1]

# Supplementary Materials: Gradual Expansion of a Stent to Prevent Periprocedural Complications after Carotid Artery Stenting for Vulnerable Severe Stenotic Lesions with Intraplaque Hemorrhages: A Retrospective Observational Study

**Table S1.** Information about procedures of carotid artery stenting.

| Groups                                      | Overall       | IPH group     | non-IPH group           |
|---------------------------------------------|---------------|---------------|-------------------------|
|                                             | N = 68        | N = 30        | N = 38                  |
| CAS procedure                               |               | GE            | standard                |
| Lesion laterality                           |               |               |                         |
| Right, n (%)                                | 36 (52.9%)    | 19 (63.3%)    | 11 (36.7%)              |
| Approach for introducing a stent            | Transbrachial | Transbrachial | Transbrachial           |
| Distal protection during CAS                | Filter        | Filter        | Filter                  |
| Proximal protection during CAS              | None          | None          | None                    |
| Balloon diameter for pre-SA                 |               |               |                         |
| 3.0 mm, n (%)                               | 22 (32.4%)    | 22 (66.7%)    | 0                       |
| 4.0 mm, n (%)                               | 46 (67.6%)    | 8 (33.3%)     | 38 (100%)               |
| Inflated balloon diameter (mm)              |               | 3.0 or 4.0 mm | 4.0 or 4.23 mm          |
| Balloon inflation pressure                  | 8 or 14 atm   | 8 atm (NP)    | 14 atm except for ex-CS |
| Implanted stents                            |               |               |                         |
| Closed-cell stent, n (%)                    | 68 (100%)     | 30 (100%)     | 38 (100%)               |
| Nominal diameter of the implanted stent, mm | 10.0 mm       | 10.0 mm       | 10.0 mm                 |
| Post-SA                                     | No            | No            | No                      |
| Procedural time, (minutes), median (IQR)    | 57 (46, 67)   | 52 (44, 67.5) | 60 (53, 68)             |

CAS, carotid artery stenting; ex-CS, extremely high-grade carotid stenosis; GE, gradual expansion; IPH, intraplaque hemorrhage; IQR, interquartile range; n, number; NP, nominal pressure; SA, stenting angioplasty.

**Table S2.** Minimal luminal diameter before carotid artery stenting and minimal stent diameter immediately after carotid artery stenting.

|                          | MLD before CAS    | MSD after CAS     | p-value |
|--------------------------|-------------------|-------------------|---------|
| Overall (n=68), mm       | 0.85 (0.54, 1.09) | 3.42 (2.82, 3.73) | < 0.001 |
| IPH group (n=30), mm     | 0.76 (0.54, 1.05) | 2.97 (2.62, 3.54) | < 0.001 |
| non-IPH group (n=38), mm | 0.90 (0.53, 1.14) | 3.58 (3.13, 3.86) | < 0.001 |

All values are represented as median (interquartile range). CAS, carotid artery stenting; IPH, intraplaque hemorrhage; MLD, minimal luminal diameter; MSD, minimal stent diameter; n, number; p, probability.

**Table S3.** Carotid artery stenosis rate before and immediately after carotid artery stenting.

|                         | CASr before CAS   | CASr after CAS    | p-value |
|-------------------------|-------------------|-------------------|---------|
| Overall (n=68), %       | 80.9 (76.9, 86.7) | 29.2 (18.6, 38.8) | < 0.001 |
| IPH group (n=30), %     | 81.2 (77.4, 88.1) | 37.5 (26.6, 44.6) | < 0.001 |
| non-IPH group (n=38), % | 80.7 (76.5, 86.0) | 26.4 (15.9, 34.2) | < 0.001 |

All values are represented as median (interquartile range). CAS, carotid artery stenting; CASr, carotid artery stenosis rate; IPH, intraplaque hemorrhage; n, number, p, probability.

**Table S4.** Middle cerebral artery relative signal intensity before and immediately after carotid artery stenting.

|                      | MCA rSI before<br>CAS | MCA rSI after<br>CAS | <i>p</i> -value |
|----------------------|-----------------------|----------------------|-----------------|
| Overall (n=68)       | 0.87 (0.74, 0.98)     | 1.01 (0.92, 1.06)    | < 0.001         |
| IPH group (n=30)     | 0.88 (0.74, 0.98)     | 1.02 (0.97, 1.06)    | < 0.001         |
| non-IPH group (n=38) | 0.87 (0.74, 0.96)     | 0.98 (0.89, 1.07)    | < 0.001         |

All values are represented as median (interquartile range). CAS, carotid artery stenting; IPH, intraplaque hemorrhage; MCA, middle cerebral artery; n, number; p, probability; rSI, relative signal intensity.

**Table S5.** Peak systolic velocity before and immediately after carotid artery stenting.

|                            | PSV before CAS | PSV after CAS     | <i>p</i> -value |
|----------------------------|----------------|-------------------|-----------------|
| Overall (n=68), cm/s       | 281 (210, 348) | 83 (67.2, 113.8)  | < 0.001         |
| IPH group (n=30), cm/s     | 271 (215, 337) | 97.6 (70.0, 147)  | < 0.001         |
| non-IPH group (n=38), cm/s | 293 (178, 361) | 80.1 (64.9, 91.2) | < 0.001         |

All values are represented as median (interquartile range). CAS, carotid artery stenting; IPH, intraplaque hemorrhage; n, number; p, probability; PSV, peak systolic velocity.

**Table S6.** Minimal stent diameter immediately after and at 4 months after carotid artery stenting.

|                          | MSD after CAS     | MSD at 4 months after<br>CAS | <i>p</i> -value |
|--------------------------|-------------------|------------------------------|-----------------|
| Overall (n=59), mm       | 3.26 (2.64, 3.80) | 3.97 (3.46, 4.47)            | < 0.001         |
| IPH group (n=26), mm     | 2.97 (2.62, 3.54) | 3.89 (3.22, 4.75)            | < 0.001         |
| non-IPH group (n=33), mm | 3.58 (3.13, 3.86) | 4.04 (3.57, 4.33)            | < 0.001         |

All values are represented as median (interquartile range). CAS, carotid artery stenting; IPH, intraplaque hemorrhage; MSD, minimal stent diameter; n, number; p, probability.

**Table S7.** Carotid artery stenosis rate immediately after and at 4 months after carotid artery stenting.

|                         | CASr after CAS    | CASr at 4 months after CAS | <i>p</i> -value |
|-------------------------|-------------------|----------------------------|-----------------|
| Overall (n=59), %       | 28.1 (18.4, 38.8) | 26.0 (16.5, 33.5)          | < 0.001         |
| IPH group (n=26), %     | 37.5 (26.6, 45.9) | 27.7 (18.5, 40.7)          | < 0.001         |
| non-IPH group (n=33), % | 25.9 (16.0, 34.0) | 24.3 (14.2, 32.2)          | < 0.001         |

All values are represented as median (interquartile range). CAS, carotid artery stenting; CASr, carotid artery stenosis rate; IPH, intraplaque hemorrhage; n, number; p, probability.
